# Supplementary material for: Features and Associated Factors of the Behavioral Development of 24-month-old Children in Rural China: Follow-up Evaluation of a Randomized Controlled Trial
Source: PubMed Central journal article supplement (PMC6143539; doi:10.1038/s41598-018-32171-1), 2018-09-18
Supplement: 41598_2018_32171_MOESM1_ESM.pdf [file 41598_2018_32171_MOESM1_ESM.pdf]

# Features and Associated Factors of the Behavioral Development of 24-month-old Children in Rural China: Follow-up Evaluation of a Randomized Controlled Trial

Xue Yang, Zhaoyang Yin, Yue Cheng, Wenfang Yang, Zhonghai Zhu, Min Zhang, Danyang Li, Danli Liu, Hong Yan & Lingxia Zeng\*

**Supplementary Table S1** Comparison of baseline characteristics in different BSID completed groups

| Characteristic                                                                   | Completed BSID |            | <i>P</i> |
|----------------------------------------------------------------------------------|----------------|------------|----------|
|                                                                                  | Yes(n=657)     | No(n=646)  |          |
| <b>Demographic characteristics</b>                                               |                |            |          |
| Maternal educational level, n (%)                                                |                |            | 0.098    |
| Primary school or less                                                           | 175 (26.6)     | 207 (32.4) |          |
| Secondary school                                                                 | 396 (60.3)     | 363 (56.2) |          |
| High school or above                                                             | 86 (13.1)      | 76 (11.8)  |          |
| Maternal occupation, n (%)                                                       |                |            | 0.680    |
| Farmer                                                                           | 555 (84.5)     | 551 (85.3) |          |
| Other                                                                            | 102 (15.5)     | 95 (14.7)  |          |
| Paternal educational level, n (%) <sup>a</sup>                                   |                |            | 0.203    |
| Primary school or less                                                           | 65 (9.9)       | 74 (11.5)  |          |
| Secondary school                                                                 | 449 (68.5)     | 455 (70.8) |          |
| High school or above                                                             | 140 (21.4)     | 114 (17.7) |          |
| Paternal occupation, n (%)                                                       |                |            | 0.287    |
| Farmer                                                                           | 492 (74.9)     | 500 (77.4) |          |
| Other                                                                            | 165 (25.1)     | 146 (22.6) |          |
| Household wealth during pregnancy, n (%)                                         |                |            | 0.120    |
| Poor                                                                             | 138 (21.0)     | 166 (25.7) |          |
| Middle                                                                           | 271 (41.3)     | 258 (39.9) |          |
| Wealthy                                                                          | 248 (37.8)     | 222 (34.4) |          |
| <b>Maternal nutritional status and micronutrient supplement during pregnancy</b> |                |            |          |
| Age at delivery, mean±SD, y                                                      | 25.5±4.6       | 25.3±0.4   | 0.147    |
| MUAC at enrollment, mean±SD, cm                                                  | 23.1±1.8       | 23.2±1.8   | 0.141    |
| Micronutrient supplement, n (%)                                                  |                |            | 0.948    |
| Folic acid                                                                       | 236 (35.9)     | 230 (35.6) |          |
| Iron-folic acid                                                                  | 223 (33.9)     | 216 (33.4) |          |
| MMN                                                                              | 198 (30.1)     | 200 (30.9) |          |
| No. of supplement tablets, mean±SD                                               | 173.3±41.1     | 167.4±41.7 | 0.011    |

|                                         |              |              |        |
|-----------------------------------------|--------------|--------------|--------|
| Birth outcomes                          |              |              |        |
| Gestation at birth,mean±SD,w            | 39.9±1.6     | 39.9±1.5     | 0.383  |
| Birth weight,mean±SD,g                  | 3179.5±409.0 | 3189.1±411.0 | 0.672  |
| Birth length, mean±SD, cm               | 49.2±2.5     | 49.0±2.5     | 0.142  |
| Birth head circumference, mean±SD, cm   | 33.2±1.6     | 33.4±1.4     | 0.086  |
| Apgar score at 5min after birth,mean±SD | 9.9±0.5      | 9.8±0.6      | 0.025  |
| Gender,n (%)                            |              |              | 0.853  |
| Boy                                     | 404 (61.5)   | 394 (61.0)   |        |
| Girl                                    | 253 (38.5)   | 252 (39.0)   |        |
| Toddler characteristics at 24 months    |              |              |        |
| Age of the assessment,mean±SD,d         | 24.5±0.6     | 24.3±0.41    | <0.001 |
| Length, mean±SD, cm                     | 84.6±3.2     | 84.6±3.4     | 0.853  |
| Weight, mean±SD, kg                     | 11.7±1.3     | 11.5±1.2     | 0.065  |
| Primary caregivers, n (%) <sup>b</sup>  |              |              | 0.078  |
| Parents                                 | 342 (53.3)   | 245 (48.0)   |        |
| Grandparents                            | 300 (46.7)   | 265 (52.0)   |        |

---

BSID, Bayley scale of infant development; SD, standard deviation; MUAC, mid-upper arm circumference; MMN, multiple micronutrient. <sup>a</sup>Paternal educational level missing 6. <sup>b</sup>Primary caregivers missing 15.

**Supplementary Table S2** Univariate analysis of factors associated with infant behavioral development at 24 months of age

| Index                                                           | N (%)      | Activity     |          | Social adaptability |          | Reactivity   |          | Endurance    |          | Concentration |          | Motor coordination |          |
|-----------------------------------------------------------------|------------|--------------|----------|---------------------|----------|--------------|----------|--------------|----------|---------------|----------|--------------------|----------|
|                                                                 |            | mean±SD      | <i>P</i> | mean±SD             | <i>P</i> | mean±SD      | <i>P</i> | mean±SD      | <i>P</i> | mean±SD       | <i>P</i> | mean±SD            | <i>P</i> |
| Maternal nutrition status and adverse exposure during pregnancy |            |              |          |                     |          |              |          |              |          |               |          |                    |          |
| MUAC <sup>a</sup>                                               |            |              | 0.164    |                     | 0.984    |              | 0.972    |              | 0.527    |               | 0.982    |                    | 0.726    |
| ≤23.5                                                           | 405 (61.6) | -0.040±1.037 |          | 0.003±0.998         |          | -0.001±1.012 |          | -0.020±0.995 |          | -0.002±1.004  |          | -0.012±1.012       |          |
| >23.5                                                           | 245 (37.3) | 0.073±0.941  |          | 0.004±1.024         |          | 0.001±0.985  |          | 0.031±0.994  |          | -0.001±1.003  |          | 0.017±0.988        |          |
| Micronutrient supplementation                                   |            |              | 0.381    |                     | 0.195    |              | 0.500    |              | 0.370    |               | 0.994    |                    | 0.291    |
| Folic acid                                                      | 236 (35.9) | -0.025±1.011 |          | -0.076±1.033        |          | 0.036±1.046  |          | -0.034±1.081 |          | -0.004±0.946  |          | 0.050±0.937        |          |
| Iron –folic acid                                                | 223 (33.9) | -0.046±1.036 |          | -0.006±0.989        |          | -0.064±0.969 |          | 0.077±0.910  |          | -0.002±1.033  |          | 0.029±1.050        |          |
| MMN                                                             | 198 (30.1) | 0.081±0.944  |          | 0.098±0.969         |          | 0.029±0.979  |          | -0.046±0.997 |          | 0.006±1.030   |          | -0.092±1.014       |          |
| No. of supplement tablets                                       |            |              | 0.579    |                     | 0.198    |              | 0.392    |              | 0.951    |               | 0.948    |                    | 0.839    |
| ≤180                                                            | 325 (49.5) | -0.022±1.024 |          | -0.051±1.033        |          | -0.034±1.030 |          | 0.002±1.053  |          | 0.003±0.985   |          | 0.008±1.020        |          |
| >180                                                            | 332 (50.5) | 0.021±0.977  |          | 0.050±0.966         |          | 0.033±0.970  |          | -0.002±0.946 |          | -0.003±1.016  |          | -0.008±0.981       |          |
| Smoke exposure                                                  |            |              | 0.434    |                     | 0.466    |              | 0.665    |              | 0.331    |               | 0.398    |                    | 0.408    |
| Yes                                                             | 368 (56.0) | -0.027±0.982 |          | 0.025±0.971         |          | 0.015±0.975  |          | -0.034±1.001 |          | 0.030±0.920   |          | 0.029±1.029        |          |
| No                                                              | 289 (44.0) | 0.034±1.023  |          | -0.032±1.036        |          | -0.019±1.032 |          | 0.043±0.998  |          | -0.038±1.094  |          | -0.036±0.963       |          |
| Toxic chemical exposure                                         |            |              | 0.004    |                     | 0.998    |              | 0.184    |              | 0.078    |               | 0.448    |                    | 0.365    |
| Yes                                                             | 153 (23.3) | -0.195±1.047 |          | -0.009±1.016        |          | -0.088±0.985 |          | -0.124±0.948 |          | 0.045±0.992   |          | -0.066±1.037       |          |
| No                                                              | 504 (76.7) | 0.071±0.973  |          | -0.009±0.995        |          | 0.035±1.010  |          | 0.039±1.015  |          | -0.025±1.001  |          | 0.018±0.991        |          |
| Alcohol exposure                                                |            |              | 0.034    |                     | 0.057    |              | 0.512    |              | 0.340    |               | 0.530    |                    | 0.320    |
| Yes                                                             | 18 (2.7)   | -0.490±1.120 |          | 0.444±0.821         |          | -0.147±0.904 |          | 0.222±0.918  |          | 0.145±0.972   |          | 0.238±0.906        |          |
| No                                                              | 626 (95.3) | 0.019±1.000  |          | -0.008±0.997        |          | 0.010±1.005  |          | -0.007±1.006 |          | -0.006±1.002  |          | 0.002±0.997        |          |
| Household wealth during pregnancy                               |            |              | 0.019    |                     | 0.001    |              | 0.181    |              | <0.001   |               | 0.500    |                    | 0.590    |
| Poor                                                            | 138 (21.0) | -0.013±0.978 |          | -0.214±1.116        |          | -0.131±1.082 |          | -0.265±1.047 |          | 0.063±0.907   |          | -0.077±0.981       |          |

|                                                 |            |              |              |              |              |              |              |
|-------------------------------------------------|------------|--------------|--------------|--------------|--------------|--------------|--------------|
| Middle                                          | 271 (41.3) | -0.114±0.996 | -0.042±0.943 | 0.008±0.966  | -0.006±0.940 | 0.018±1.019  | 0.027±1.031  |
| Wealthy                                         | 248 (37.8) | 0.132±1.004  | 0.165±0.968  | 0.064±0.987  | 0.154±1.009  | -0.055±1.028 | 0.013±0.977  |
| Adverse birth outcomes                          |            |              |              |              |              |              |              |
| LBW <sup>b</sup>                                |            | 0.453        | 0.965        | 0.446        | 0.773        | 0.117        | 0.934        |
| Yes                                             | 26 (4.0)   | -0.135±0.977 | -0.003±0.801 | -0.147±1.182 | -0.055±1.219 | -0.409±1.321 | -0.025±0.737 |
| No                                              | 621 (94.5) | 0.014±0.996  | 0.004±1.011  | 0.005±0.989  | 0.003±0.995  | 0.015±0.981  | -0.008±1.013 |
| SGA                                             |            | 0.309        | 0.748        | 0.223        | 0.136        | 0.887        | 0.031        |
| Yes                                             | 118 (18.0) | 0.085±1.023  | 0.027±0.992  | -0.110±1.103 | 0.124±1.018  | -0.012±1.104 | -0.180±0.998 |
| No                                              | 539 (82.0) | -0.019±0.995 | -0.006±1.003 | 0.024±0.975  | -0.027±0.995 | 0.003±0.977  | 0.039±0.997  |
| Preterm                                         |            | 0.688        | 0.369        | 0.378        | 0.061        | 0.153        | 0.254        |
| Yes                                             | 14 (2.1)   | 0.106±0.796  | 0.238±1.234  | -0.246±1.023 | -0.639±1.188 | 0.378±1.082  | 0.302±0.688  |
| No                                              | 643 (97.9) | -0.002±1.004 | -0.005±0.995 | 0.005±1.000  | 0.014±0.992  | -0.008±0.977 | -0.007±1.005 |
| Toddler nutrition status and primary caregivers |            |              |              |              |              |              |              |
| at 24 months                                    |            |              |              |              |              |              |              |
| Malnutrition <sup>c</sup>                       |            | 0.003        | 0.434        | 0.112        | 0.201        | 0.888        | 0.243        |
| Yes                                             | 97 (14.8)  | -0.315±1.144 | -0.076±1.041 | -0.146±1.023 | -0.110±1.020 | 0.010±0.970  | -0.110±1.100 |
| No                                              | 548 (83.4) | 0.058±0.968  | 0.010±0.988  | 0.029±0.993  | 0.030±1.000  | -0.010±1.010 | 0.020±0.990  |
| Primary caregivers <sup>d</sup>                 |            | 0.046        | 0.118        | 0.314        | 0.859        | 0.962        | 0.167        |
| Grandparents                                    | 300 (45.7) | 0.089±1.009  | -0.070±0.964 | 0.043±0.998  | 0.120±1.109  | -0.002±0.960 | -0.064±1.032 |
| Parents                                         | 342 (52.1) | -0.070±0.999 | 0.053±1.017  | -0.036±1.003 | -0.002±0.905 | -0.005±1.044 | 0.046±0.978  |

SD, standard deviation; MUAC, mid-upper arm circumference; MMN, multiple micronutrient; LBW, low birth weight; SGA, small for gestational age. <sup>a</sup>MUAC missing 7. <sup>b</sup>LBW missing 10. <sup>c</sup>Malnutrition missing 12. <sup>d</sup>Primary caregivers missing 15.
